# Supplementary material for: The Evolutionary Pattern and the Regulation of Stearoyl-CoA Desaturase Genes
Source: Hindawi journal article supplement (doi:10.1155/2013/856521), 2013-01-01
Supplement: f1 [file 856521.f1.pdf]

**Table S1. Information of species, genes and sequence code used in this study**

| <b>Species</b>                  | <b>Genes</b>        | <b>Sequence code</b>          |
|---------------------------------|---------------------|-------------------------------|
| <i>Saccharomyces cerevisiae</i> | <i>ole-1</i>        | Ensemble: YGL055W             |
| <i>Caenorhabditis elegans</i>   | <i>fat5</i>         | WormBase: WBGene00001397      |
|                                 | <i>fat6</i>         | WormBase: WBGene00001398      |
|                                 | <i>fat7</i>         | WormBase: WBGene00001399      |
|                                 | <i>hsc70-4, scd</i> | FlyBase: FBgn0001219          |
| <i>Drosophila melanogaster</i>  |                     |                               |
| <i>Ciona savignyi</i>           | <i>scda</i>         | Ensemble: ENSCSAVP00000003593 |
|                                 | <i>scdb</i>         | Ensemble: ENSCSAVP00000004039 |
|                                 | <i>scdc</i>         | Ensemble: ENSCSAVP00000003934 |
| <i>Branchiostoma floridae</i>   | <i>scda</i>         | GenBank: XP_002588865         |
|                                 | <i>scdb</i>         | GenBank: XP_002585987         |
|                                 | <i>scdc</i>         | GenBank: XP_002596094         |
| <i>Danio rerio</i>              | <i>scd1a</i>        | ZFIN: ZDB-GENE-031106-3       |
|                                 | <i>scd1b</i>        | ZFIN: ZDB-GENE-050522-12      |
| <i>Gasterosteus aculeatus</i>   | <i>scd1a</i>        | Ensemble: ENSGACG00000002397  |
|                                 | <i>scd1b</i>        | Ensemble: ENSGACG00000008487  |
| <i>Oryzias latipes</i>          | <i>scd1a</i>        | Ensemble: ENSORLG00000009222  |
|                                 | <i>scd1b</i>        | Ensemble: ENSORLG00000006839  |
| <i>Tetraodon nigoviridis</i>    | <i>scd1a</i>        | Ensemble: ENSTNIG00000019395  |
|                                 | <i>scd1b</i>        | Ensemble: ENSTNIG0000000140   |
| <i>Xenopus tropicalis</i>       | <i>scd</i>          | Ensemble: ENSXETG000000023757 |
| <i>Scyliorhinus canicula</i>    | <i>scd1</i>         | GenBank: JF729408             |
|                                 | <i>scd5</i>         | GenBank: JF729409             |
| <i>Anolis carolinensis</i>      | <i>scd1</i>         | Ensemble: ENSACAP00000010645  |
|                                 | <i>scd5</i>         | Ensemble: ENSACAP00000010271  |
| <i>Taeniopygia guttata</i>      | <i>scd1</i>         | Ensemble: ENSTGUP00000007924  |
|                                 | <i>scd5</i>         | Ensemble: ENSTGUP00000002919  |
| <i>Gallus gallus</i>            | <i>scd1</i>         | Ensemble: ENSGALP00000039331  |
|                                 | <i>scd5</i>         | Ensemble: ENSGALP00000018194  |
| <i>Meleagris gallopavo</i>      | <i>SCD1</i>         | Ensemble: ENSMGAG00000007446  |
|                                 | <i>SCD5</i>         | Ensemble: ENSMGAG00000008016  |
| <i>Ornithorhynchus anatinus</i> | <i>scd1</i>         | Ensemble: ENSOANG00000002477  |
| <i>Monodelphis domestica</i>    | <i>scd1</i>         | Ensemble: ENSMODG00000010632  |
|                                 | <i>scd5</i>         | Ensemble: ENSMODG00000011983  |
| <i>Macropus eugenii</i>         | <i>scd1</i>         | Ensemble: ENSMEUG00000004515  |
| <i>Mus musculus</i>             | <i>scd1</i>         | Ensemble: ENSMUSG00000037071  |
|                                 | <i>scd2</i>         | Ensemble: ENSMUSG00000025203  |
|                                 | <i>scd3</i>         | Ensemble: ENSMUSG00000025202  |
|                                 | <i>scd4</i>         | Ensemble: ENSMUSG00000050195  |
| <i>Rattus norvegicus</i>        | <i>scd1</i>         | GenBank: NP_631931            |
| <i>Tupaia belangeri</i>         | <i>scd1</i>         | This study                    |
|                                 | <i>scd5</i>         |                               |

|                                      |             |                              |
|--------------------------------------|-------------|------------------------------|
| <i>Oryctolagus cuniculus</i>         | <i>scd1</i> | GenBank: XP_002718695        |
|                                      | <i>scd2</i> | GenBank: XP_002718696        |
|                                      | <i>scd3</i> | GenBank: XP_002718697        |
|                                      | <i>scd4</i> | GenBank: XP_002718662        |
|                                      | <i>scd5</i> | Ensemble: ENSOCUG00000005937 |
| <i>Macaca mulatta</i>                | <i>scd1</i> | Ensemble: ENSMMUP00000014179 |
|                                      | <i>scd5</i> | Ensemble: ENSMMUG00000000866 |
| <i>Gorilla gorilla</i>               | <i>scd1</i> | Ensemble: ENSGGOP0000001081  |
|                                      | <i>scd5</i> | Ensemble: ENSGGOP00000004994 |
| <i>Pan troglodytes</i>               | <i>scd1</i> | Ensemble: ENSPTRG00000002847 |
|                                      | <i>scd5</i> | Ensemble: ENSPTRG00000016220 |
| <i>Homo sapiens</i>                  | <i>scd1</i> | Ensemble: ENSG00000099194    |
|                                      | <i>scd5</i> | Ensemble: ENSG00000145284    |
| <i>Loxodonta africana</i>            | <i>scd1</i> | Ensemble: ENSLAFP00000014914 |
|                                      | <i>scd5</i> | Ensemble: ENSLAFP00000013895 |
| <i>Canis familiaris</i>              | <i>scd1</i> | GenBank: Xp543968            |
|                                      | <i>scd5</i> | GenBank: Xp544953            |
| <i>Tursiops truncatus</i>            | <i>scd1</i> | Ensemble: ENSTTRP00000011286 |
|                                      | <i>scd5</i> | Ensemble: ENSTTRP00000007215 |
| <i>Sus scrofa</i>                    | <i>scd1</i> | Ensemble: ENSSSCG00000010554 |
|                                      | <i>scd5</i> | Ensemble: ENSSSCG00000009245 |
| <i>Equus caballus</i>                | <i>scd1</i> | Ensembl: ENSECAG00000014658  |
|                                      | <i>scd5</i> | Ensembl: ENSECAT00000015537  |
| <i>Vicugna pacos</i>                 | <i>scd1</i> | Ensemble: ENSVPAP00000009395 |
|                                      | <i>scd5</i> | Ensemble: ENSVPAP00000002239 |
| <i>Pteropus vampyrus</i>             | <i>scd5</i> | Ensemble: ENSPVAG00000016815 |
| <i>Bos taurus</i>                    | <i>scd5</i> | Ensemble: ENSBTAT00000025820 |
| <i>Callithrix jacchus</i>            | <i>scd5</i> | Ensemble: ENSCJAG00000017338 |
| <i>Spermophilus tridecemlineatus</i> | <i>scd5</i> | Ensemble: ENSSTOG00000006758 |
| <i>Cavia porcellus</i>               | <i>scd5</i> | Ensemble: ENSCPOP00000002936 |
| <i>Choloepus hoffmanni</i>           | <i>scd5</i> | Ensemble: ENSCHOP00000003699 |
| <i>Erinaceus europaeus</i>           | <i>scd5</i> | Ensemble: ENSEEUT00000011642 |

---
